# Supplementary material for: Modelling Reveals Kinetic Advantages of Co-Transcriptional Splicing
Source: PLOS journal article supplement (doi:10.1371/journal.pcbi.1002215), 2011-10-13
Supplement: S3 (10.1371/journal.pcbi.1002215.s003) [file journal.pcbi.1002215.s003]

301 Moved Permanently

# Moved Permanently

The document has moved here.

---

Apache Server at www.ploscompbiol.org Port 80
