# Supplementary material for: Modelling Reveals Kinetic Advantages of Co-Transcriptional Splicing
Source: PLOS journal article supplement (doi:10.1371/journal.pcbi.1002215), 2011-10-13
Supplement: S3 (10.1371/journal.pcbi.1002215.s003) [file journal.pcbi.1002215.s003]

# Modelling reveals kinetic advantages of co-transcriptional splicing - Supplementary Text 2

Stuart Aitken<sup>1\*</sup>, Ross D. Alexander<sup>1,2</sup>, Jean D. Beggs<sup>1,2</sup>

**1** Centre for Systems Biology, University of Edinburgh, Edinburgh, UK

**2** Wellcome Trust Centre for Cell Biology, University of Edinburgh, Edinburgh, UK

\* E-mail: s.aitken@ed.ac.uk

## Contents

|                                  |   |
|----------------------------------|---|
| Kinetics of multi-step processes | 1 |
| Supplementary References         | 2 |
| Supplementary Tables             | 4 |

## Kinetics of multi-step processes

The degradation of Ribo1 pre-mRNA was measured in an “OFF strain” of 5'SSRibo1 where transcription can be halted by doxycycline (Alexander *et al.*, 2010), see Figure 1A. Similarly, the degradation of lariat-exon2 was measured in an OFF strain of 3'SSRibo1 (Alexander *et al.*, 2010), see Figure 1B.

Degradation can be modelled as a single reaction that depletes the population of species  $C$  from an initially constant level (model A). Alternatively, depletion can be modelled as occurring in multiple steps that produce a series of intermediates  $I_1 \dots I_n$  (model B). In both cases, we can consider the corresponding accumulation of species  $D$ : the degraded molecules derived from  $C$ . These models are defined and solved below.

### (A) single step of depletion

$$dC/dt = -\alpha C \quad (1)$$

$$dD_1/dt = \alpha C \quad (2)$$

$$C = C_0 e^{-\alpha t} \quad (3)$$

$$D_1 = C_0(1 - e^{-\alpha t}) \quad (4)$$

### (B) multiple steps of depletion

$$dC/dt = -\alpha C \quad (5)$$

$$dI_1/dt = \alpha C - \alpha I_1 \quad (6)$$

$$dI_i/dt = \alpha I_{i-1} - \alpha I_i \quad (7)$$

$$dD_{n+1}/dt = \alpha I_n \quad (8)$$

$$C = C_0 e^{-\alpha t} \quad (9)$$

$$I_n = C_0 \alpha^n t^n e^{-\alpha t} \quad (10)$$

$$D_{n+1} = C_0 - C_0 e^{-\alpha t} - \sum_{k=1}^n C_0 \alpha^k t^k e^{-\alpha t} / k! \quad (11)$$

In model B, we might choose to define all intermediate species  $I_i$  as still being instances of  $C$  as they have not yet completed the process of becoming  $D$ . This is relevant to the degradation of mRNA as partially-deadenylated

mRNA remains competent for translation (if at a reduced rate of transcription initiation (Goldstrohm and Wickens, 2008)).

Based on the ODE models of degradation as a 1 step (model A), or a 2 or 3 step process (model B), the following functions were optimised to the data using a nonlinear least squares method implemented in R (R Foundation). We assume the intermediate species contribute to the precursor  $C$  ( $C_{n+1} = C_0 - D_{n+1}$ ). In addition to the rate parameter  $\alpha$ , optimal values for the scaling parameter  $\beta$  and offset  $\gamma$  were also identified.

$$C_1 = \gamma + \beta e^{-\alpha t} \quad (12)$$

$$C_2 = \gamma + \beta(e^{-\alpha t} + \alpha t e^{-\alpha t}) \quad (13)$$

$$C_3 = \gamma + \beta(e^{-\alpha t} + \alpha t e^{-\alpha t} + \alpha^2 t^2 e^{-\alpha t} / 2) \quad (14)$$

The alternative model predictions are shown in Figure 1, and the AIC scores and Akaike weights for each model are listed in Table 1. The Akaike weights,  $w_i$ , can be interpreted as the probability of model  $i$ , given the set of three candidate models under consideration. For lariat-exon2, the 2 step model is the most probable ( $P=0.59$ ), but the simple exponential decay model (1 step) is also a candidate ( $P=0.24$ ). For pre-mRNA, the 3 step model has probability 0.92, leaving only a probability of 0.08 that one of the other models applies. Therefore, there is considerable evidence for multiple steps in pre-mRNA degradation. Degradation is known to be a multi-step process, and has been modelled in detail (Cao and Parker, 2003). The optimal model parameters are listed in Table 2.

## References

- Alexander, R., Barrass, D., Dicht, B., Kos, M., Obtulowicz, T., Robert, M.-C., Korper, M., Karkusiewicz, I., Mariconti, L., Tollervey, D., Dichtl, B., Kufel, J., Bertrand, E., and Beggs, J. (2010). Ribosys, a high resolution, quantitative approach to measure the in vivo kinetics of pre-mRNA splicing and 3' end processing in *saccharomyces cerevisiae*. *RNA*, **16**, 2570–2580.
- Cao, D. and Parker, R. (2003). Computational modeling and experimental analysis of nonsense-mediated decay in yeast. *Cell*, **113**(4), 533–545.
- Goldstrohm, A. C. and Wickens, M. (2008). Multifunctional deadenylase complexes diversify mRNA control. *Nat Rev Mol Cell Biol*, **9**(4), 337–344.

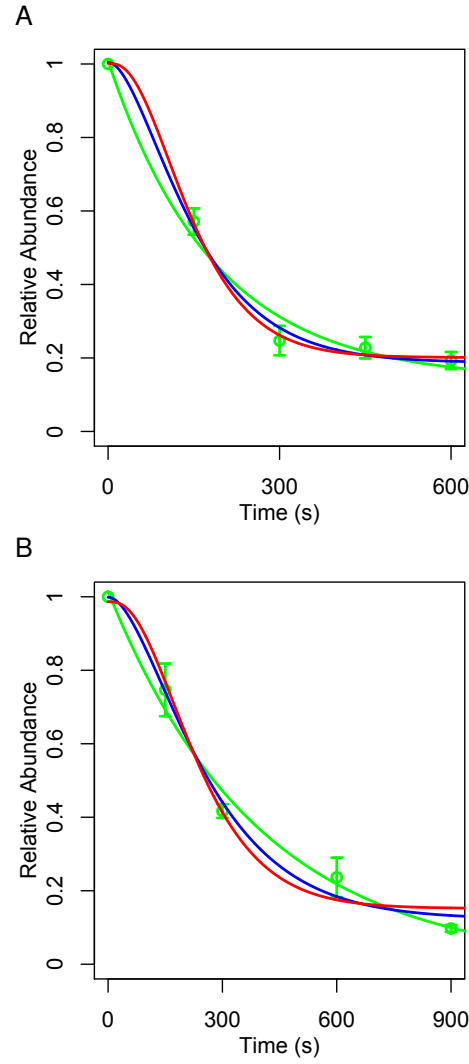

**Figure 1.** The degradation of 5'SSRibo1 and 3'SSRibo1 products. **(A)** Degradation of unspliced pre-mRNA (5'SSRibo1). **(B)** Degradation of lariat-exon2 (3'SSRibo1). Symbols indicate data. Error bars show the standard error of three biological replicates. Solid lines are model predictions: 1 step model (green); 2 step model (blue); 3 step model (red).

| Model  | pre-mRNA |            | lariat-exon2 |            |
|--------|----------|------------|--------------|------------|
|        | AIC      | Akaike wt. | AIC          | Akaike wt. |
| 1 step | -10.8    | 0.003      | -11.0        | 0.24       |
| 2 step | -17.0    | 0.074      | -12.8        | 0.59       |
| 3 step | -22.1    | 0.923      | -10.3        | 0.17       |

**Table 1.** Comparison of degradation models for 5'SSRibo1 and 3'SSRibo1 products. Akaike weights represent the normalised likelihood of each of the three models (see Materials and Methods).

| Data         | Model  | $\gamma$  | $\beta$  | $\alpha$ (half-life min.) |
|--------------|--------|-----------|----------|---------------------------|
| pre-mRNA     | 1 step | 0.141266  | 0.867559 | 0.005415 (2.1)            |
| pre-mRNA     | 2 step | 0.18691   | 0.81739  | 0.01231 (1.9)             |
| pre-mRNA     | 3 step | 0.20105   | 0.80033  | 0.01904 (1.8)             |
| lariat-exon2 | 1 step | -0.004757 | 1.019712 | 0.002534 (4.6)            |
| lariat-exon2 | 2 step | 0.122608  | 0.876035 | 0.007215 (3.2)            |
| lariat-exon2 | 3 step | 0.15184   | 0.83459  | 0.01180 (2.9)             |

**Table 2.** Optimal parameter values for 5'SSRibo1 and 3'SSRibo1 degradation models. Half lives are given for the reaction as a whole where the reaction has multiple steps.
